---

Corrigendum

## **DiscoRhythm: an easy-to-use web application and R package for discovering rhythmicity**

**Matthew Carlucci, Algimantas Kriščiūnas, Haohan Li, Povilas Gibas, Karolis Koncevičius, Art Petronis and Gabriel Oh**

---

*Bioinformatics* (2020) doi: 10.1093/bioinformatics/btz834

In the original article, there was an omission in the funding section. In its entirety, the section should read:

### **Funding**

This work was supported by the Lithuanian Science Foundation (S-MIP-19-66), the Canadian Institutes of Health Research

[MOP119451, MOP-133496, PJT 148719, NTC-154084, IGH-155180, TGH158223], the National Institute of Mental Health [1R01MH105409-01], Brain Canada and CAMH Foundation [554] and the Krembil Foundation.

*Conflict of Interest:* none declared.

These details have been corrected only in this corrigendum to preserve the published version of record.
